# Supplementary material for: Longitudinal stability in cigarette smokers of urinary eicosanoid biomarkers of oxidative damage and inflammation
Source: PubMed Central journal article supplement (PMC6483352; doi:10.1371/journal.pone.0215853), 2019-04-25
Supplement: pone.0215853.s002.pdf [file pone.0215853.s002.pdf]

## S2 Supporting Information. Summary of variables by week.

### Summary of variables by week

#### Creatinine corrected

| Week | Variable                                     | N   | Mean   | Std Dev | Std Error | Min   | Max      | Median | Geometric Mean |
|------|----------------------------------------------|-----|--------|---------|-----------|-------|----------|--------|----------------|
| 4    | 8-isoPGF <sub>2α</sub> /creatinine (pmol/mg) | 226 | 1.340  | 1.077   | 0.072     | 0.075 | 13.469   | 1.115  | 1.140          |
|      | PGEM/creatinine (pmol/mg)                    | 232 | 73.702 | 112.482 | 7.385     | 0.356 | 1519.679 | 46.179 | 49.032         |
| 8    | 8-isoPGF <sub>2α</sub> /creatinine (pmol/mg) | 215 | 1.317  | 0.831   | 0.057     | 0.021 | 6.717    | 1.112  | 1.124          |
|      | PGEM/creatinine (pmol/mg)                    | 222 | 74.777 | 88.524  | 5.941     | 0.485 | 788.402  | 50.873 | 49.188         |
| 12   | 8-isoPGF <sub>2α</sub> /creatinine (pmol/mg) | 210 | 1.279  | 0.736   | 0.051     | 0.120 | 4.976    | 1.063  | 1.097          |
|      | PGEM/creatinine (pmol/mg)                    | 217 | 75.432 | 121.070 | 8.219     | 0.945 | 1551.640 | 47.215 | 48.260         |
| 16   | 8-isoPGF <sub>2α</sub> /creatinine (pmol/mg) | 206 | 1.260  | 0.731   | 0.051     | 0.179 | 4.721    | 1.048  | 1.101          |
|      | PGEM/creatinine (pmol/mg)                    | 212 | 80.698 | 92.232  | 6.335     | 0.631 | 905.530  | 54.871 | 54.752         |
| 20   | 8-isoPGF <sub>2α</sub> /creatinine (pmol/mg) | 209 | 1.348  | 0.928   | 0.064     | 0.162 | 6.587    | 1.092  | 1.134          |
|      | PGEM/creatinine (pmol/mg)                    | 210 | 74.232 | 142.324 | 9.821     | 0.736 | 1841.490 | 47.111 | 46.323         |

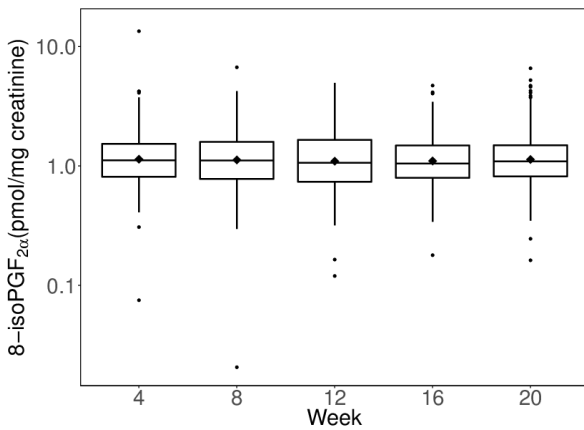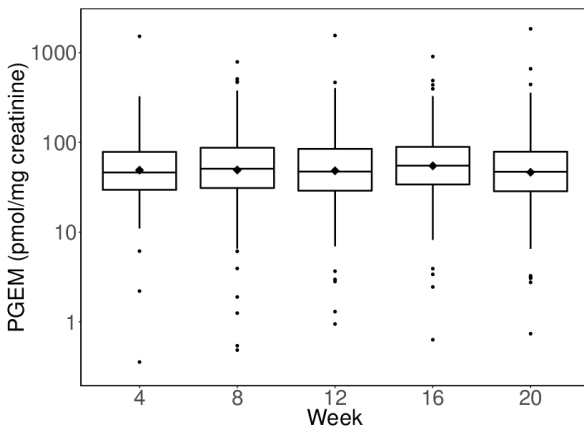

Horizontal line inside the box: median; black diamond: mean; bottom and top edge of the box: 1<sup>st</sup> and 3<sup>rd</sup> quartile (interquartile range [IQR]); the upper whisker extends from the top of the box to the largest value no further than 1.5 times IQR and the bottom whisker extends from the bottom of the box to the smallest value no further than 1.5 times IQR; the y-axis is in natural log scale.

**Non-corrected**

| Week | Variable                         | N   | Mean   | Std Dev | Std Error | Minimum | Maximum  |
|------|----------------------------------|-----|--------|---------|-----------|---------|----------|
| 4    | 8-isoPGF <sub>2α</sub> (pmol/mL) | 226 | 1.470  | 1.073   | 0.071     | 0.015   | 7.481    |
|      | PGEM (pmol/mL)                   | 232 | 83.745 | 108.804 | 7.143     | 0.550   | 823.833  |
| 8    | 8-isoPGF <sub>2α</sub> (pmol/mL) | 215 | 1.398  | 1.070   | 0.073     | 0.015   | 7.916    |
|      | PGEM (pmol/mL)                   | 222 | 84.109 | 133.705 | 8.974     | 0.550   | 1458.530 |
| 12   | 8-isoPGF <sub>2α</sub> (pmol/mL) | 210 | 1.421  | 1.153   | 0.080     | 0.094   | 7.576    |
|      | PGEM (pmol/mL)                   | 217 | 82.577 | 107.059 | 7.268     | 0.550   | 1040.256 |
| 16   | 8-isoPGF <sub>2α</sub> (pmol/mL) | 206 | 1.405  | 1.220   | 0.085     | 0.072   | 9.259    |
|      | PGEM (pmol/mL)                   | 212 | 89.713 | 107.094 | 7.355     | 0.550   | 756.763  |
| 20   | 8-isoPGF <sub>2α</sub> (pmol/mL) | 209 | 1.468  | 1.225   | 0.085     | 0.101   | 10.134   |
|      | PGEM (pmol/mL)                   | 210 | 84.515 | 118.297 | 8.163     | 0.550   | 834.797  |

**TNE corrected**

| Week | Variable                                                  | N   | Mean  | Std Dev | Std Error | Minimum | Maximum |
|------|-----------------------------------------------------------|-----|-------|---------|-----------|---------|---------|
| 4    | 8-isoPGF <sub>2α</sub> (TNE corrected, ×10 <sup>3</sup> ) | 226 | 0.053 | 0.208   | 0.014     | 0.000   | 2.317   |
|      | PGEM (TNE corrected, ×10 <sup>3</sup> )                   | 232 | 2.310 | 6.555   | 0.430     | 0.012   | 78.407  |
| 8    | 8-isoPGF <sub>2α</sub> (TNE corrected, ×10 <sup>3</sup> ) | 215 | 0.046 | 0.189   | 0.013     | 0.001   | 2.278   |
|      | PGEM (TNE corrected, ×10 <sup>3</sup> )                   | 222 | 2.410 | 8.055   | 0.541     | 0.009   | 92.530  |
| 12   | 8-isoPGF <sub>2α</sub> (TNE corrected, ×10 <sup>3</sup> ) | 210 | 0.078 | 0.523   | 0.036     | 0.001   | 7.345   |
|      | PGEM (TNE corrected, ×10 <sup>3</sup> )                   | 217 | 2.925 | 10.390  | 0.705     | 0.010   | 112.053 |
| 16   | 8-isoPGF <sub>2α</sub> (TNE corrected, ×10 <sup>3</sup> ) | 206 | 0.046 | 0.151   | 0.011     | 0.003   | 1.798   |
|      | PGEM (TNE corrected, ×10 <sup>3</sup> )                   | 212 | 2.659 | 6.766   | 0.465     | 0.016   | 76.976  |
| 20   | 8-isoPGF <sub>2α</sub> (TNE corrected, ×10 <sup>3</sup> ) | 209 | 0.067 | 0.288   | 0.020     | 0.002   | 3.166   |
|      | PGEM (TNE corrected, ×10 <sup>3</sup> )                   | 210 | 3.709 | 15.315  | 1.057     | 0.025   | 153.810 |

**Creatinine-and-TNE-corrected**

| Week | Variable                                                     | N   | Mean  | Std Dev | Std Error | Minimum | Maximum |
|------|--------------------------------------------------------------|-----|-------|---------|-----------|---------|---------|
| 4    | 8-isoPGF <sub>2α</sub> (uL/mg, creatinine and TNE corrected) | 226 | 0.060 | 0.200   | 0.013     | 0.002   | 2.370   |
|      | PGEM (uL/mg, creatinine and TNE corrected)                   | 232 | 4.108 | 28.917  | 1.899     | 0.008   | 435.596 |
| 8    | 8-isoPGF <sub>2α</sub> (uL/mg, creatinine and TNE corrected) | 215 | 0.051 | 0.142   | 0.010     | 0.001   | 1.416   |
|      | PGEM (uL/mg, creatinine and TNE corrected)                   | 222 | 3.239 | 13.544  | 0.909     | 0.008   | 181.541 |
| 12   | 8-isoPGF <sub>2α</sub> (uL/mg, creatinine and TNE corrected) | 210 | 0.088 | 0.569   | 0.039     | 0.001   | 8.036   |
|      | PGEM (uL/mg, creatinine and TNE corrected)                   | 217 | 3.729 | 13.076  | 0.888     | 0.017   | 122.605 |
| 16   | 8-isoPGF <sub>2α</sub> (uL/mg, creatinine and TNE corrected) | 206 | 0.058 | 0.170   | 0.012     | 0.002   | 1.961   |
|      | PGEM (uL/mg, creatinine and TNE corrected)                   | 212 | 4.062 | 14.545  | 0.999     | 0.018   | 158.039 |
| 20   | 8-isoPGF <sub>2α</sub> (uL/mg, creatinine and TNE corrected) | 209 | 0.071 | 0.280   | 0.019     | 0.002   | 3.457   |
|      | PGEM (uL/mg, creatinine and TNE corrected)                   | 210 | 4.394 | 19.955  | 1.377     | 0.090   | 204.385 |
