# Supplementary material for: Longitudinal stability in cigarette smokers of urinary eicosanoid biomarkers of oxidative damage and inflammation
Source: PubMed Central journal article supplement (PMC6483352; doi:10.1371/journal.pone.0215853), 2019-04-25
Supplement: pone.0215853.s003.pdf [file pone.0215853.s003.pdf]

### S3 Supporting Information. Coefficients of variation and ICC corrected by various parameters.

#### Coefficients of variation (CV)

##### Creatinine-corrected

| Variable                                     | N   | Mean | Median | 25th Pctl | 75th Pctl | Minimum | Maximum |
|----------------------------------------------|-----|------|--------|-----------|-----------|---------|---------|
| 8-isoPGF <sub>2α</sub> /creatinine (pmol/mg) | 222 | 0.31 | 0.17   | 0.28      | 0.19      | 0.39    | 0.03    |
| PGEM/creatinine (pmol/mg)                    | 224 | 0.54 | 0.32   | 0.47      | 0.33      | 0.68    | 0.11    |

##### Non-corrected

| Variable                         | N   | Mean | Median | 25%  | 75%  | Min  | Max  |
|----------------------------------|-----|------|--------|------|------|------|------|
| 8-isoPGF <sub>2α</sub> (pmol/mL) | 222 | 0.45 | 0.21   | 0.43 | 0.29 | 0.59 | 0.06 |
| PGEM (pmol/mL)                   | 224 | 0.65 | 0.29   | 0.59 | 0.45 | 0.80 | 0.07 |

##### TNE-corrected

| Variable                                                  | N   | Mean | Median | 25%  | 75%  | Min  | Max  |
|-----------------------------------------------------------|-----|------|--------|------|------|------|------|
| 8-isoPGF <sub>2α</sub> (TNE corrected, ×10 <sup>3</sup> ) | 222 | 0.42 | 0.30   | 0.33 | 0.24 | 0.51 | 0.09 |
| PGEM (TNE corrected, ×10 <sup>3</sup> )                   | 224 | 0.61 | 0.37   | 0.50 | 0.37 | 0.74 | 0.01 |

##### Creatinine-and-TNE-corrected

| Variable                                                     | N   | Mean | Median | 25%  | 75%  | Min  | Max  |
|--------------------------------------------------------------|-----|------|--------|------|------|------|------|
| 8-isoPGF <sub>2α</sub> (uL/mg, creatinine and TNE corrected) | 222 | 0.63 | 0.34   | 0.56 | 0.4  | 0.76 | 0.04 |
| PGEM (uL/mg, creatinine and TNE corrected)                   | 224 | 0.73 | 0.41   | 0.65 | 0.44 | 0.89 | 0.04 |

#### Conclusion

8-epiPGF<sub>2α</sub> has smaller CV (better stability) than PGEM, regardless of the correction.

#### Estimated ICC based on the mixed model of log-transformed values

| Variable               | N   | Creatinine corrected ICC (95% CI) | Non corrected ICC (95% CI) | TNE corrected ICC (95% CI) | Creatinine and TNE corrected ICC (95% CI) |
|------------------------|-----|-----------------------------------|----------------------------|----------------------------|-------------------------------------------|
| 8-isoPGF <sub>2α</sub> | 232 | 0.51 (0.45, 0.57)                 | 0.42 (0.36, 0.49)          | 0.59 (0.53, 0.65)          | 0.51 (0.45, 0.57)                         |
| PGEM                   | 234 | 0.36 (0.30, 0.43)                 | 0.41 (0.35, 0.48)          | 0.53 (0.47, 0.59)          | 0.47 (0.40, 0.53)                         |

#### Conclusion

8-isoPGF<sub>2α</sub> has higher ICC (better stability) than PGEM, regardless of the correction.
