# Supplementary material for: Longitudinal stability in cigarette smokers of urinary eicosanoid biomarkers of oxidative damage and inflammation
Source: PubMed Central journal article supplement (PMC6483352; doi:10.1371/journal.pone.0215853), 2019-04-25

## S4 Supporting Information. Correlation between log 8-iso-PGF<sub>2α</sub> and log total nicotine equivalents (TNE).

Correlation between log 8-isoPGF<sub>2α</sub> (pmol/mL) and log TNE (nmol/mL)  
R=0.56 (95% CI, 0.51, 0.60, p<.0001).

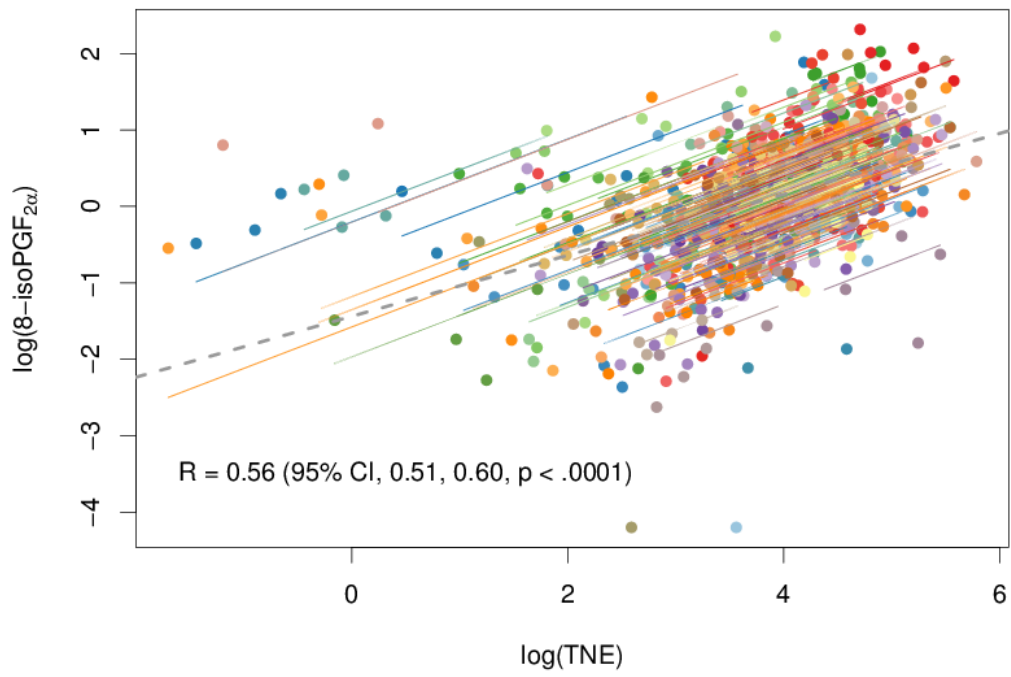

Supplement: pone.0215853.s004.pdf [file pone.0215853.s004.pdf]
