# Supplementary material for: Longitudinal stability in cigarette smokers of urinary eicosanoid biomarkers of oxidative damage and inflammation
Source: PubMed Central journal article supplement (PMC6483352; doi:10.1371/journal.pone.0215853), 2019-04-25
Supplement: pone.0215853.s007.pdf [file pone.0215853.s007.pdf]

## S7 Supporting Information. ICC for subgroups defined by different factors.

ICC for subgroups defined by different factors

| Variable                     | Factor | Level  | N of subjects     | Creatinine corrected ICC (95% CI) | Non corrected ICC (95% CI) | TNE corrected ICC (95% CI) | Creatinine and TNE corrected ICC (95% CI) |
|------------------------------|--------|--------|-------------------|-----------------------------------|----------------------------|----------------------------|-------------------------------------------|
| Log(8-isoPGF <sub>2α</sub> ) | Gender | Female | 103               | 0.46 (0.37, 0.56)                 | 0.39 (0.29, 0.49)          | 0.65 (0.56, 0.72)          | 0.50 (0.41, 0.59)                         |
|                              |        | Male   | 129               | 0.56 (0.48, 0.64)                 | 0.42 (0.34, 0.51)          | 0.49 (0.40, 0.57)          | 0.51 (0.42, 0.59)                         |
|                              | Age    | <40    | 81                | 0.53 (0.42, 0.63)                 | 0.27 (0.17, 0.39)          | 0.55 (0.45, 0.65)          | 0.48 (0.37, 0.59)                         |
|                              |        | ≥40    | 151               | 0.50 (0.42, 0.58)                 | 0.46 (0.38, 0.54)          | 0.61 (0.54, 0.68)          | 0.52 (0.45, 0.60)                         |
|                              |        | BMI    | <25               | 79                                | 0.44 (0.33, 0.55)          | 0.37 (0.26, 0.49)          | 0.56 (0.46, 0.66)                         |
|                              | 25-29  |        | 77                | 0.57 (0.46, 0.67)                 | 0.48 (0.37, 0.59)          | 0.60 (0.50, 0.69)          | 0.48 (0.37, 0.59)                         |
|                              | ≥30    |        | 76                | 0.54 (0.43, 0.64)                 | 0.44 (0.33, 0.55)          | 0.61 (0.51, 0.70)          | 0.52 (0.42, 0.63)                         |
|                              | CPD    | <10    | 54                | 0.45 (0.32, 0.58)                 | 0.30 (0.18, 0.45)          | 0.54 (0.41, 0.66)          | 0.46 (0.33, 0.59)                         |
|                              |        | 10-19  | 111               | 0.52 (0.43, 0.61)                 | 0.42 (0.33, 0.51)          | 0.50 (0.41, 0.59)          | 0.46 (0.37, 0.56)                         |
| ≥20                          |        | 67     | 0.54 (0.42, 0.65) | 0.52 (0.40, 0.64)                 | 0.64 (0.54, 0.73)          | 0.52 (0.40, 0.63)          |                                           |
| Log(PGEM)                    | Gender | Female | 103               | 0.26 (0.18, 0.37)                 | 0.24 (0.16, 0.34)          | 0.47 (0.38, 0.57)          | 0.41 (0.32, 0.51)                         |
|                              |        | Male   | 131               | 0.43 (0.34, 0.51)                 | 0.46 (0.37, 0.55)          | 0.57 (0.49, 0.64)          | 0.53 (0.44, 0.61)                         |
|                              | Age    | <40    | 81                | 0.42 (0.31, 0.53)                 | 0.35 (0.25, 0.48)          | 0.49 (0.38, 0.60)          | 0.44 (0.33, 0.55)                         |
|                              |        | ≥40    | 153               | 0.33 (0.26, 0.42)                 | 0.43 (0.35, 0.51)          | 0.55 (0.47, 0.62)          | 0.47 (0.40, 0.55)                         |
|                              |        | BMI    | <25               | 80                                | 0.40 (0.29, 0.51)          | 0.45 (0.34, 0.56)          | 0.55 (0.44, 0.65)                         |
|                              | 25-29  |        | 78                | 0.36 (0.26, 0.48)                 | 0.42 (0.32, 0.54)          | 0.51 (0.41, 0.62)          | 0.45 (0.34, 0.56)                         |
|                              | ≥30    |        | 76                | 0.32 (0.22, 0.45)                 | 0.34 (0.24, 0.47)          | 0.53 (0.42, 0.63)          | 0.49 (0.38, 0.60)                         |
|                              | CPD    | <10    | 54                | 0.29 (0.17, 0.44)                 | 0.35 (0.23, 0.50)          | 0.50 (0.37, 0.63)          | 0.40 (0.28, 0.54)                         |
|                              |        | 10-19  | 112               | 0.39 (0.30, 0.49)                 | 0.41 (0.32, 0.51)          | 0.47 (0.38, 0.56)          | 0.42 (0.33, 0.52)                         |
| ≥20                          |        | 68     | 0.37 (0.26, 0.50) | 0.43 (0.32, 0.55)                 | 0.54 (0.43, 0.65)          | 0.50 (0.38, 0.61)          |                                           |

### Conclusions:

- Males had higher longitudinal stability than females in all biomarkers, except for TNE-corrected 8-isoPGF<sub>2α</sub>.
- Heavy smokers had higher stability in all biomarkers than light smokers.
- Age and BMI's relationship with ICC is not obvious.

Note: there is no formal test of p-value associated with these ICC comparisons. Please see the CV regression analysis and p-value toward the end of this report.
