# Supplementary material for: Longitudinal stability in cigarette smokers of urinary eicosanoid biomarkers of oxidative damage and inflammation
Source: PubMed Central journal article supplement (PMC6483352; doi:10.1371/journal.pone.0215853), 2019-04-25

## S8 Supporting Information. Boxplots of biomarker levels by week and each covariate

### Boxplots of biomarker levels by week and each covariate

#### Creatinine corrected

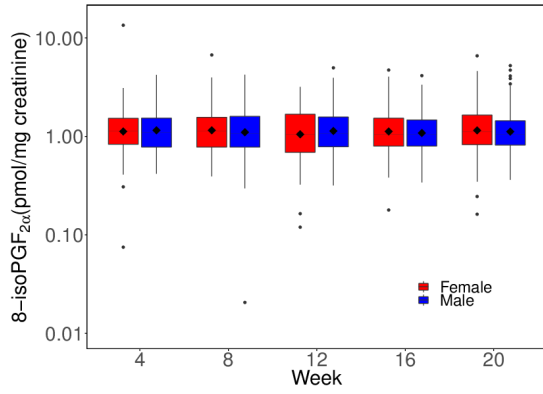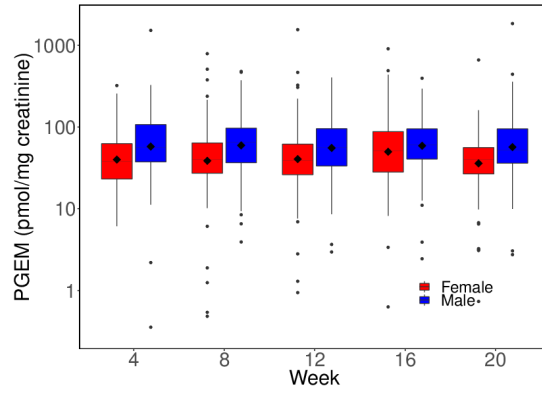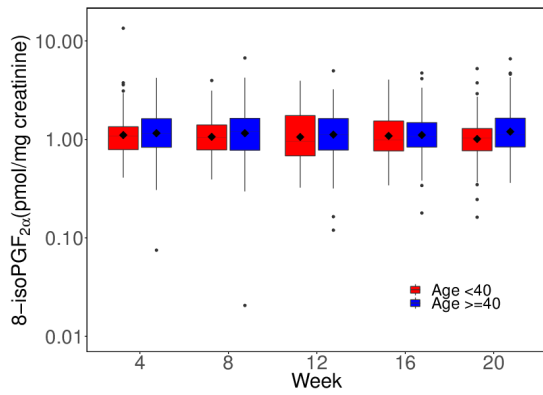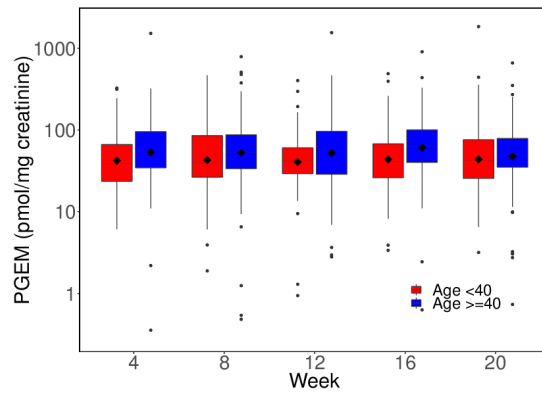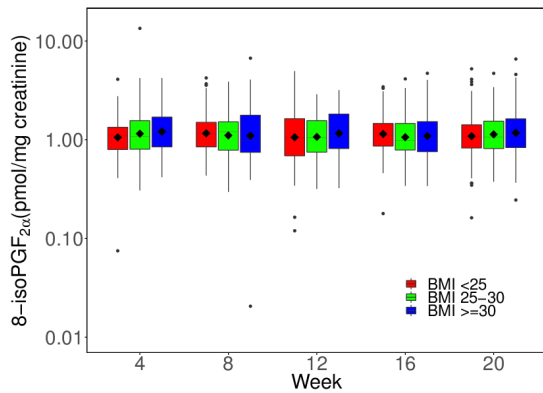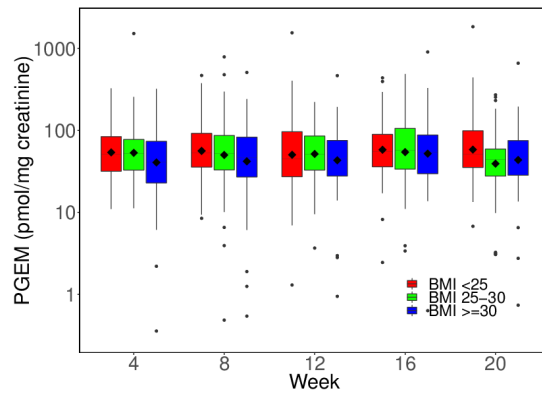

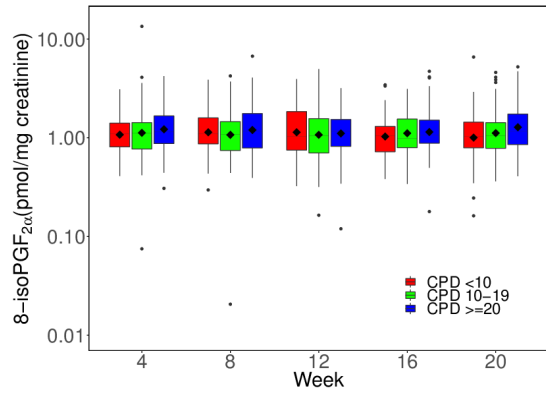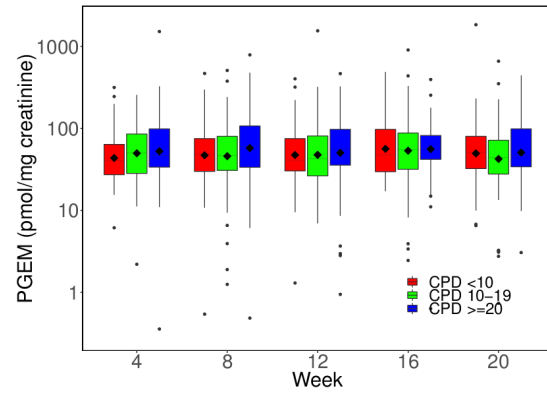

Supplement: pone.0215853.s008.pdf [file pone.0215853.s008.pdf]
