# Supplementary material for: Longitudinal stability in cigarette smokers of urinary eicosanoid biomarkers of oxidative damage and inflammation
Source: PubMed Central journal article supplement (PMC6483352; doi:10.1371/journal.pone.0215853), 2019-04-25
Supplement: pone.0215853.s009.pdf [file pone.0215853.s009.pdf]

## S9 Supporting Information. Coefficients of variation by gender, age, BMI, and cigarettes per day.

### Coefficient of variation (CV)

#### Summary of CV by groups of gender, age, BMI, and CPD

| Variable                                           | N   | Mean        | Median | 25th Pctl | 75th Pctl | Minimum | Maximum |
|----------------------------------------------------|-----|-------------|--------|-----------|-----------|---------|---------|
| <b>Creatinine-corrected</b>                        |     |             |        |           |           |         |         |
| <b>8-isoPGF<sub>2α</sub> /creatinine (pmol/mg)</b> |     |             |        |           |           |         |         |
| <i>Overall</i>                                     | 222 | <b>0.31</b> | 0.28   | 0.19      | 0.39      | 0.03    | 1.20    |
| Female                                             | 98  | <b>0.33</b> | 0.29   | 0.21      | 0.42      | 0.03    | 1.20    |
| Male                                               | 124 | <b>0.28</b> | 0.26   | 0.17      | 0.36      | 0.06    | 0.76    |
| Age<40                                             | 75  | <b>0.31</b> | 0.26   | 0.17      | 0.42      | 0.05    | 1.20    |
| Age≥40                                             | 147 | <b>0.30</b> | 0.28   | 0.20      | 0.38      | 0.03    | 0.90    |
| BMI<25                                             | 76  | <b>0.32</b> | 0.29   | 0.21      | 0.40      | 0.06    | 0.90    |
| BMI 25-29                                          | 73  | <b>0.30</b> | 0.25   | 0.18      | 0.34      | 0.05    | 1.20    |
| BMI≥30                                             | 73  | <b>0.30</b> | 0.28   | 0.19      | 0.40      | 0.03    | 0.76    |
| CPD<10                                             | 51  | <b>0.35</b> | 0.31   | 0.22      | 0.46      | 0.05    | 0.76    |
| CPD 10-19                                          | 107 | <b>0.28</b> | 0.24   | 0.18      | 0.34      | 0.03    | 1.20    |
| CPD≥20                                             | 64  | <b>0.32</b> | 0.30   | 0.18      | 0.40      | 0.07    | 0.76    |
| <b>PGEM/creatinine (pmol/mg)</b>                   |     |             |        |           |           |         |         |
| <i>Overall</i>                                     | 224 | <b>0.54</b> | 0.47   | 0.33      | 0.68      | 0.11    | 2.05    |
| Female                                             | 99  | <b>0.60</b> | 0.49   | 0.36      | 0.78      | 0.13    | 1.68    |
| Male                                               | 125 | <b>0.49</b> | 0.46   | 0.32      | 0.59      | 0.11    | 2.05    |
| Age<40                                             | 75  | <b>0.51</b> | 0.45   | 0.30      | 0.63      | 0.11    | 2.05    |
| Age≥40                                             | 149 | <b>0.55</b> | 0.48   | 0.33      | 0.71      | 0.13    | 1.68    |
| BMI<25                                             | 77  | <b>0.54</b> | 0.46   | 0.30      | 0.67      | 0.11    | 2.05    |
| BMI 25-29                                          | 74  | <b>0.53</b> | 0.49   | 0.32      | 0.66      | 0.13    | 1.61    |
| BMI≥30                                             | 73  | <b>0.55</b> | 0.47   | 0.36      | 0.70      | 0.13    | 1.44    |
| CPD<10                                             | 52  | <b>0.53</b> | 0.45   | 0.32      | 0.60      | 0.14    | 2.05    |
| CPD 10-19                                          | 108 | <b>0.53</b> | 0.47   | 0.31      | 0.68      | 0.11    | 1.68    |
| CPD≥20                                             | 64  | <b>0.57</b> | 0.49   | 0.37      | 0.77      | 0.13    | 1.61    |
| <b>Non-corrected</b>                               |     |             |        |           |           |         |         |
| <b>8-isoPGF<sub>2α</sub> (pmol/mL)</b>             |     |             |        |           |           |         |         |
| <i>Overall</i>                                     | 222 | <b>0.45</b> | 0.43   | 0.29      | 0.59      | 0.06    | 1.27    |
| Female                                             | 98  | <b>0.45</b> | 0.41   | 0.28      | 0.60      | 0.06    | 0.86    |
| Male                                               | 124 | <b>0.46</b> | 0.43   | 0.30      | 0.58      | 0.09    | 1.27    |
| Age<40                                             | 75  | <b>0.49</b> | 0.45   | 0.28      | 0.63      | 0.06    | 1.23    |
| Age≥40                                             | 147 | <b>0.44</b> | 0.42   | 0.29      | 0.56      | 0.09    | 1.27    |
| BMI<25                                             | 76  | <b>0.49</b> | 0.45   | 0.32      | 0.61      | 0.09    | 1.23    |
| BMI 25-29                                          | 73  | <b>0.45</b> | 0.41   | 0.26      | 0.61      | 0.10    | 1.27    |
| BMI≥30                                             | 73  | <b>0.42</b> | 0.41   | 0.27      | 0.52      | 0.06    | 0.79    |
| CPD<10                                             | 51  | <b>0.47</b> | 0.43   | 0.26      | 0.60      | 0.06    | 1.23    |

| Variable                                                                                 | N   | Mean        | Median | 25th Pctl | 75th Pctl | Minimum | Maximum |
|------------------------------------------------------------------------------------------|-----|-------------|--------|-----------|-----------|---------|---------|
| CPD 10-19                                                                                | 107 | <b>0.45</b> | 0.42   | 0.32      | 0.61      | 0.09    | 1.18    |
| CPD $\geq$ 20                                                                            | 64  | <b>0.44</b> | 0.45   | 0.27      | 0.57      | 0.09    | 1.27    |
| <b>PGEM (pmol/mL)</b>                                                                    |     |             |        |           |           |         |         |
| <i>Overall</i>                                                                           | 224 | <b>0.65</b> | 0.59   | 0.45      | 0.80      | 0.07    | 1.75    |
| Female                                                                                   | 99  | <b>0.69</b> | 0.62   | 0.48      | 0.84      | 0.07    | 1.68    |
| Male                                                                                     | 125 | <b>0.61</b> | 0.57   | 0.42      | 0.74      | 0.12    | 1.75    |
| Age<40                                                                                   | 75  | <b>0.63</b> | 0.60   | 0.50      | 0.74      | 0.18    | 1.39    |
| Age $\geq$ 40                                                                            | 149 | <b>0.65</b> | 0.59   | 0.42      | 0.83      | 0.07    | 1.75    |
| BMI<25                                                                                   | 77  | <b>0.66</b> | 0.59   | 0.45      | 0.82      | 0.14    | 1.59    |
| BMI 25-29                                                                                | 74  | <b>0.62</b> | 0.63   | 0.42      | 0.75      | 0.17    | 1.75    |
| BMI $\geq$ 30                                                                            | 73  | <b>0.65</b> | 0.57   | 0.46      | 0.75      | 0.07    | 1.68    |
| CPD<10                                                                                   | 52  | <b>0.65</b> | 0.65   | 0.46      | 0.81      | 0.14    | 1.39    |
| CPD 10-19                                                                                | 108 | <b>0.64</b> | 0.56   | 0.43      | 0.77      | 0.07    | 1.68    |
| CPD $\geq$ 20                                                                            | 64  | <b>0.65</b> | 0.59   | 0.46      | 0.84      | 0.22    | 1.75    |
| <b>TNE-corrected</b>                                                                     |     |             |        |           |           |         |         |
| <b>8-isoPGF<sub>2<math>\alpha</math></sub> (TNE corrected, <math>\times 10^3</math>)</b> |     |             |        |           |           |         |         |
| <i>Overall</i>                                                                           | 222 | <b>0.42</b> | 0.33   | 0.24      | 0.51      | 0.09    | 1.93    |
| Female                                                                                   | 98  | <b>0.47</b> | 0.37   | 0.26      | 0.57      | 0.10    | 1.93    |
| Male                                                                                     | 124 | <b>0.39</b> | 0.31   | 0.23      | 0.45      | 0.09    | 1.86    |
| Age<40                                                                                   | 75  | <b>0.48</b> | 0.34   | 0.24      | 0.59      | 0.09    | 1.93    |
| Age $\geq$ 40                                                                            | 147 | <b>0.40</b> | 0.33   | 0.24      | 0.49      | 0.09    | 1.30    |
| BMI<25                                                                                   | 76  | <b>0.45</b> | 0.37   | 0.26      | 0.52      | 0.10    | 1.93    |
| BMI 25-29                                                                                | 73  | <b>0.43</b> | 0.31   | 0.23      | 0.51      | 0.12    | 1.86    |
| BMI $\geq$ 30                                                                            | 73  | <b>0.40</b> | 0.34   | 0.24      | 0.45      | 0.09    | 1.56    |
| CPD<10                                                                                   | 51  | <b>0.56</b> | 0.41   | 0.29      | 0.75      | 0.12    | 1.93    |
| CPD 10-19                                                                                | 107 | <b>0.41</b> | 0.34   | 0.25      | 0.49      | 0.11    | 1.86    |
| CPD $\geq$ 20                                                                            | 64  | <b>0.33</b> | 0.28   | 0.20      | 0.43      | 0.09    | 0.97    |
| <b>PGEM (TNE corrected, <math>\times 10^3</math>)</b>                                    |     |             |        |           |           |         |         |
| <i>Overall</i>                                                                           | 224 | <b>0.61</b> | 0.50   | 0.37      | 0.74      | 0.01    | 1.98    |
| Female                                                                                   | 99  | <b>0.70</b> | 0.58   | 0.41      | 0.87      | 0.13    | 1.98    |
| Male                                                                                     | 125 | <b>0.54</b> | 0.46   | 0.36      | 0.65      | 0.01    | 1.95    |
| Age<40                                                                                   | 75  | <b>0.63</b> | 0.48   | 0.37      | 0.72      | 0.01    | 1.98    |
| Age $\geq$ 40                                                                            | 149 | <b>0.60</b> | 0.51   | 0.38      | 0.74      | 0.04    | 1.70    |
| BMI<25                                                                                   | 77  | <b>0.62</b> | 0.52   | 0.37      | 0.74      | 0.01    | 1.98    |
| BMI 25-29                                                                                | 74  | <b>0.60</b> | 0.51   | 0.38      | 0.74      | 0.06    | 1.95    |
| BMI $\geq$ 30                                                                            | 73  | <b>0.61</b> | 0.49   | 0.38      | 0.76      | 0.04    | 1.70    |
| CPD<10                                                                                   | 52  | <b>0.67</b> | 0.59   | 0.38      | 0.81      | 0.15    | 1.98    |
| CPD 10-19                                                                                | 108 | <b>0.60</b> | 0.50   | 0.37      | 0.71      | 0.01    | 1.95    |
| CPD $\geq$ 20                                                                            | 64  | <b>0.58</b> | 0.48   | 0.38      | 0.73      | 0.04    | 1.63    |
| <b>Creatinine-and-TNE-corrected</b>                                                      |     |             |        |           |           |         |         |
| <b>8-isoPGF<sub>2<math>\alpha</math></sub> (uL/mg, creatinine and TNE corrected)</b>     |     |             |        |           |           |         |         |

| Variable                                          | N   | Mean        | Median | 25th Pctl | 75th Pctl | Minimum | Maximum |
|---------------------------------------------------|-----|-------------|--------|-----------|-----------|---------|---------|
| <i>Overall</i>                                    | 222 | <b>0.63</b> | 0.56   | 0.40      | 0.76      | 0.04    | 1.88    |
| Female                                            | 98  | <b>0.69</b> | 0.57   | 0.43      | 0.87      | 0.17    | 1.88    |
| Male                                              | 124 | <b>0.58</b> | 0.54   | 0.38      | 0.73      | 0.04    | 1.75    |
| Age<40                                            | 75  | <b>0.69</b> | 0.57   | 0.40      | 0.79      | 0.04    | 1.88    |
| Age>=40                                           | 147 | <b>0.60</b> | 0.54   | 0.40      | 0.76      | 0.09    | 1.65    |
| BMI<25                                            | 76  | <b>0.62</b> | 0.55   | 0.38      | 0.73      | 0.12    | 1.88    |
| BMI 25-29                                         | 73  | <b>0.65</b> | 0.56   | 0.42      | 0.79      | 0.04    | 1.77    |
| BMI>=30                                           | 73  | <b>0.62</b> | 0.56   | 0.41      | 0.76      | 0.09    | 1.77    |
| CPD<10                                            | 51  | <b>0.75</b> | 0.60   | 0.43      | 0.91      | 0.09    | 1.88    |
| CPD 10-19                                         | 107 | <b>0.62</b> | 0.54   | 0.39      | 0.76      | 0.12    | 1.65    |
| CPD>=20                                           | 64  | <b>0.55</b> | 0.52   | 0.39      | 0.66      | 0.04    | 1.59    |
| <b>PGEM (uL/mg, creatinine and TNE corrected)</b> |     |             |        |           |           |         |         |
| <i>Overall</i>                                    | 224 | <b>0.73</b> | 0.65   | 0.44      | 0.89      | 0.04    | 2.17    |
| Female                                            | 99  | <b>0.84</b> | 0.71   | 0.47      | 1.09      | 0.15    | 2.11    |
| Male                                              | 125 | <b>0.65</b> | 0.60   | 0.40      | 0.80      | 0.04    | 2.17    |
| Age<40                                            | 75  | <b>0.77</b> | 0.62   | 0.44      | 0.97      | 0.04    | 2.17    |
| Age>=40                                           | 149 | <b>0.71</b> | 0.65   | 0.43      | 0.86      | 0.15    | 2.11    |
| BMI<25                                            | 77  | <b>0.72</b> | 0.70   | 0.42      | 0.90      | 0.04    | 2.17    |
| BMI 25-29                                         | 74  | <b>0.75</b> | 0.66   | 0.44      | 0.93      | 0.15    | 2.05    |
| BMI>=30                                           | 73  | <b>0.72</b> | 0.60   | 0.46      | 0.86      | 0.15    | 1.91    |
| CPD<10                                            | 52  | <b>0.82</b> | 0.71   | 0.45      | 1.03      | 0.23    | 2.17    |
| CPD 10-19                                         | 108 | <b>0.72</b> | 0.68   | 0.41      | 0.87      | 0.04    | 2.11    |
| CPD>=20                                           | 64  | <b>0.67</b> | 0.58   | 0.44      | 0.77      | 0.15    | 1.93    |
