# Supplementary material for: Longitudinal stability in cigarette smokers of urinary eicosanoid biomarkers of oxidative damage and inflammation
Source: PubMed Central journal article supplement (PMC6483352; doi:10.1371/journal.pone.0215853), 2019-04-25

## S10 Supporting Information. Scatter plots of CV for continuous age, BMI, and CPD.

### Age

CV of 8-isoPGF<sub>2α</sub>/creatinine (pmol/mg), 8-isoPGF<sub>2α</sub> (pmol/mL), 8-isoPGF<sub>2α</sub> (TNE corrected, ×10<sup>3</sup>), and 8-isoPGF<sub>2α</sub> (uL/mg, creatinine and TNE corrected) vs. age

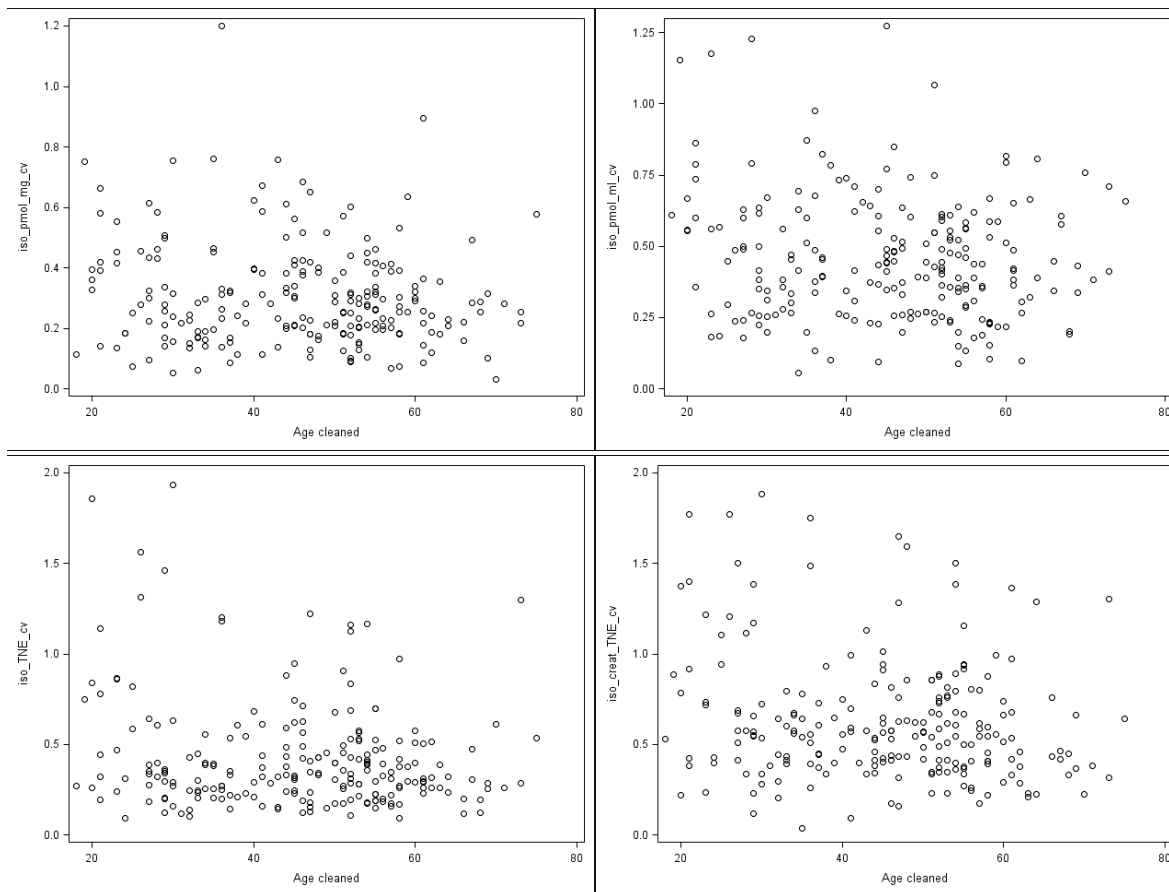

**CV of PGEM/creatinine (pmol/mg), PGEM (pmol/mL), PGEM (TNE corrected,  $\times 10^3$ ), and PGEM (uL/mg, creatinine and TNE corrected) vs. age**

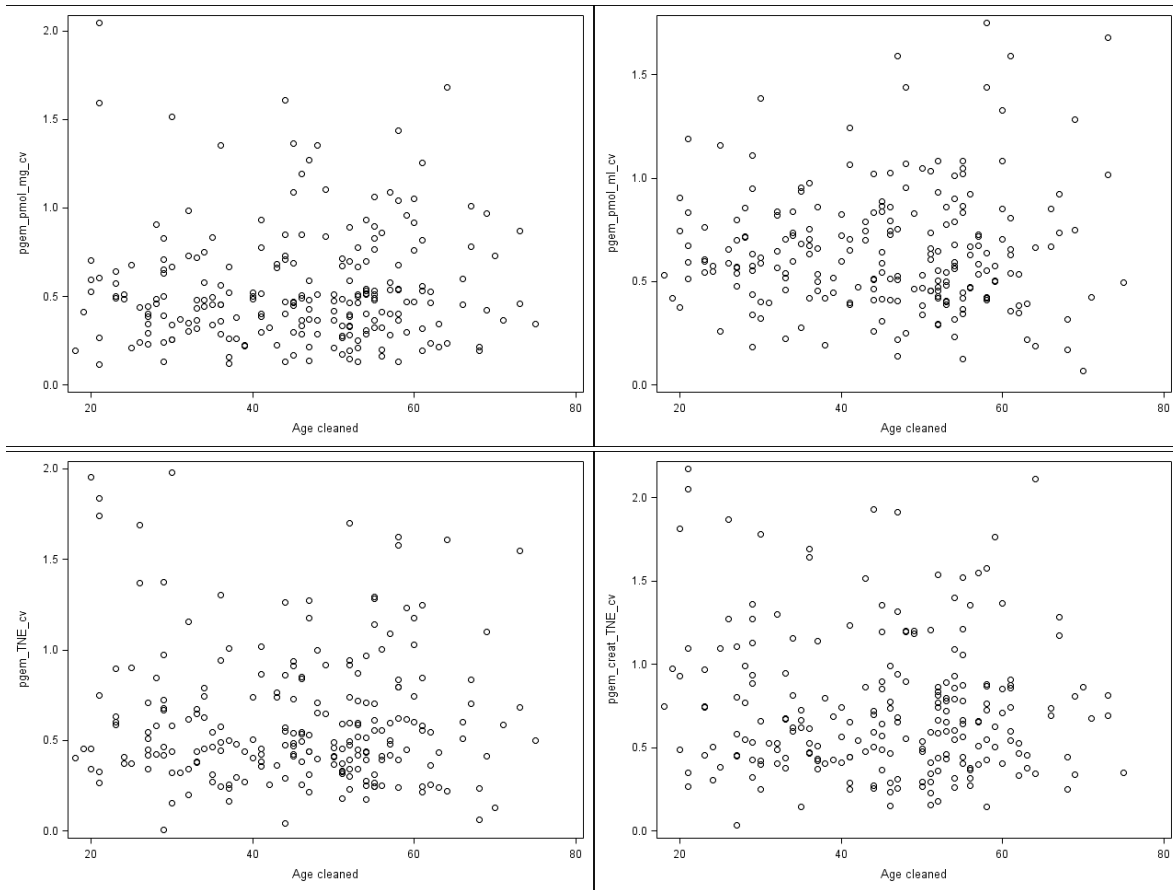

**BMI**

**CV of 8-isoPGF<sub>2α</sub>/creatinine (pmol/mg), 8-isoPGF<sub>2α</sub> (pmol/mL), 8-isoPGF<sub>2α</sub> (TNE corrected, ×10<sup>3</sup>), and 8-isoPGF<sub>2α</sub> (uL/mg, creatinine and TNE corrected) vs. BMI**

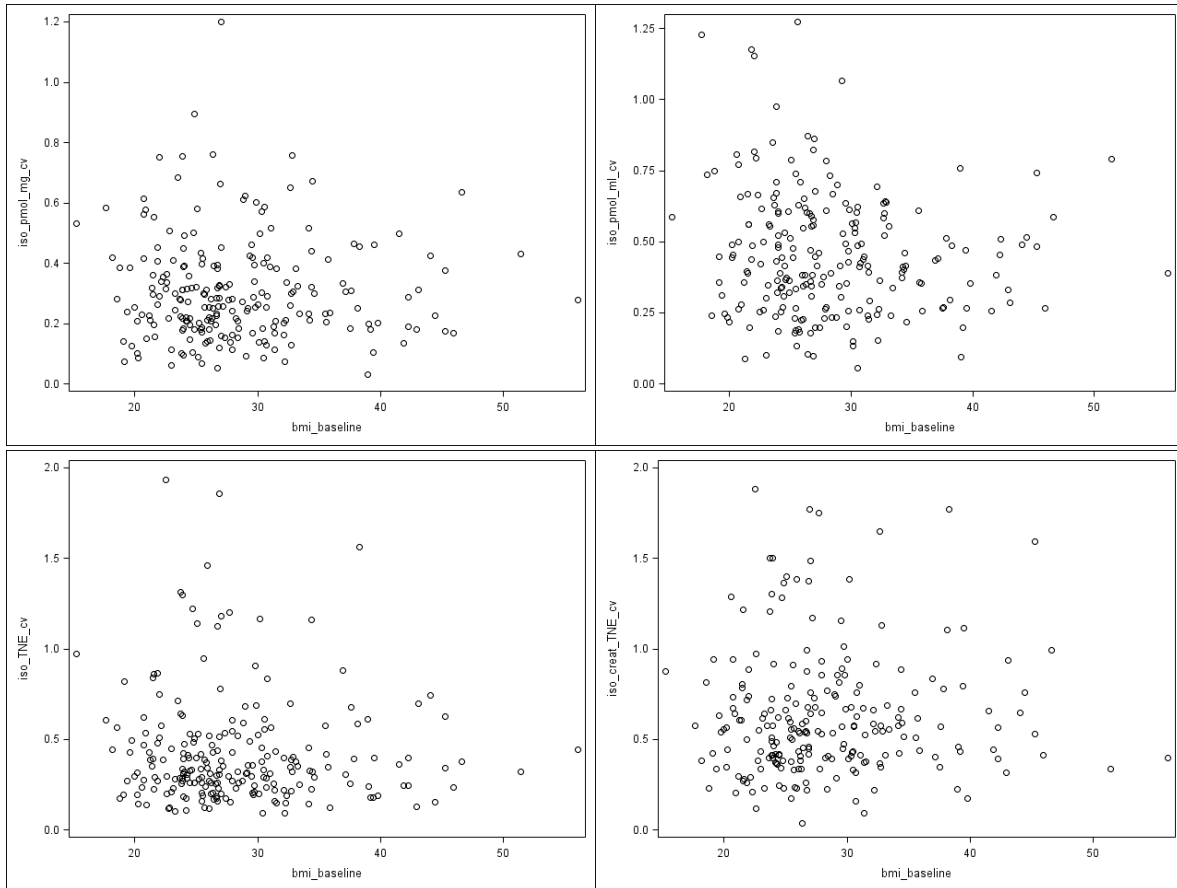

**CV of PGEM/creatinine (pmol/mg), PGEM (pmol/mL), PGEM (TNE corrected,  $\times 10^3$ ), and PGEM (uL/mg, creatinine and TNE corrected) vs. BMI**

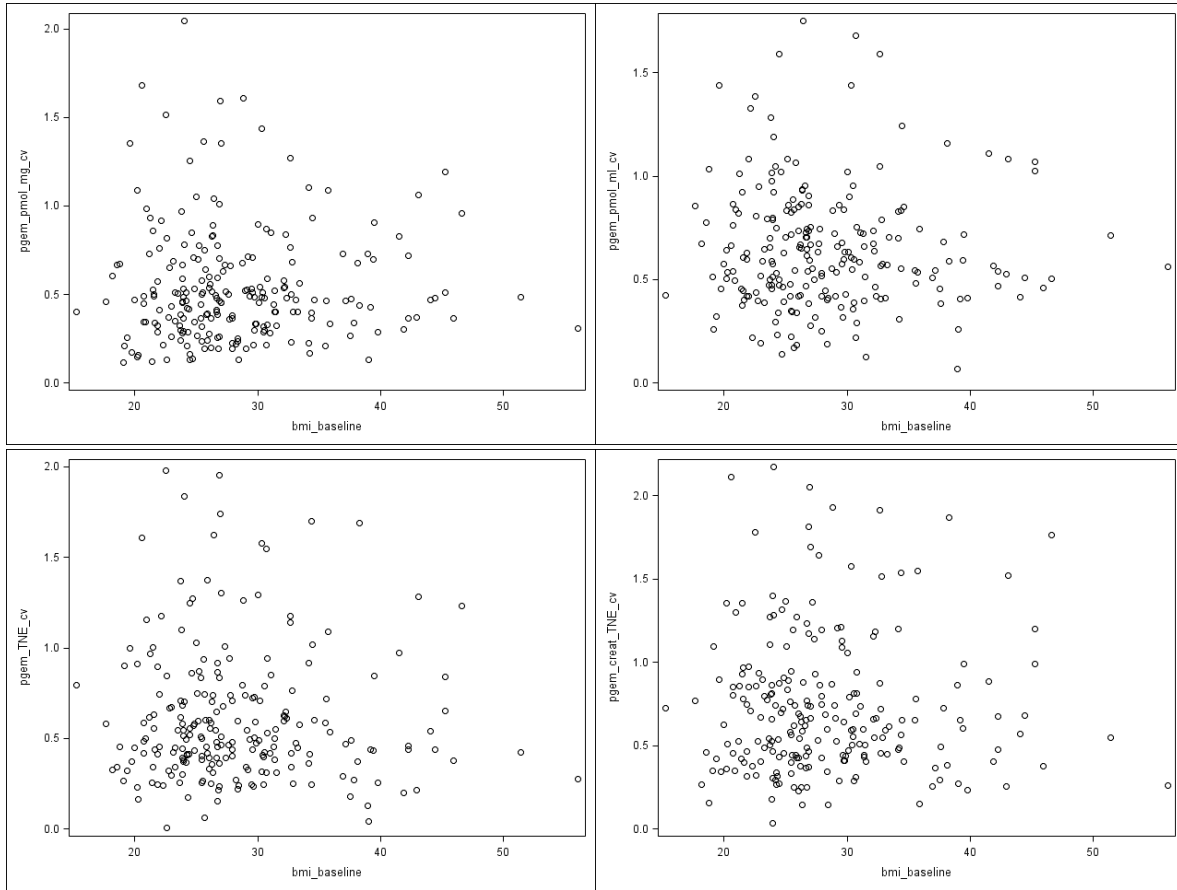

**CPD**

**CV of 8-isoPGF<sub>2α</sub>/creatinine (pmol/mg), 8-isoPGF<sub>2α</sub> (pmol/mL), 8-isoPGF<sub>2α</sub> (TNE corrected, ×10<sup>3</sup>), and 8-isoPGF<sub>2α</sub> (uL/mg, creatinine and TNE corrected) vs. CPD**

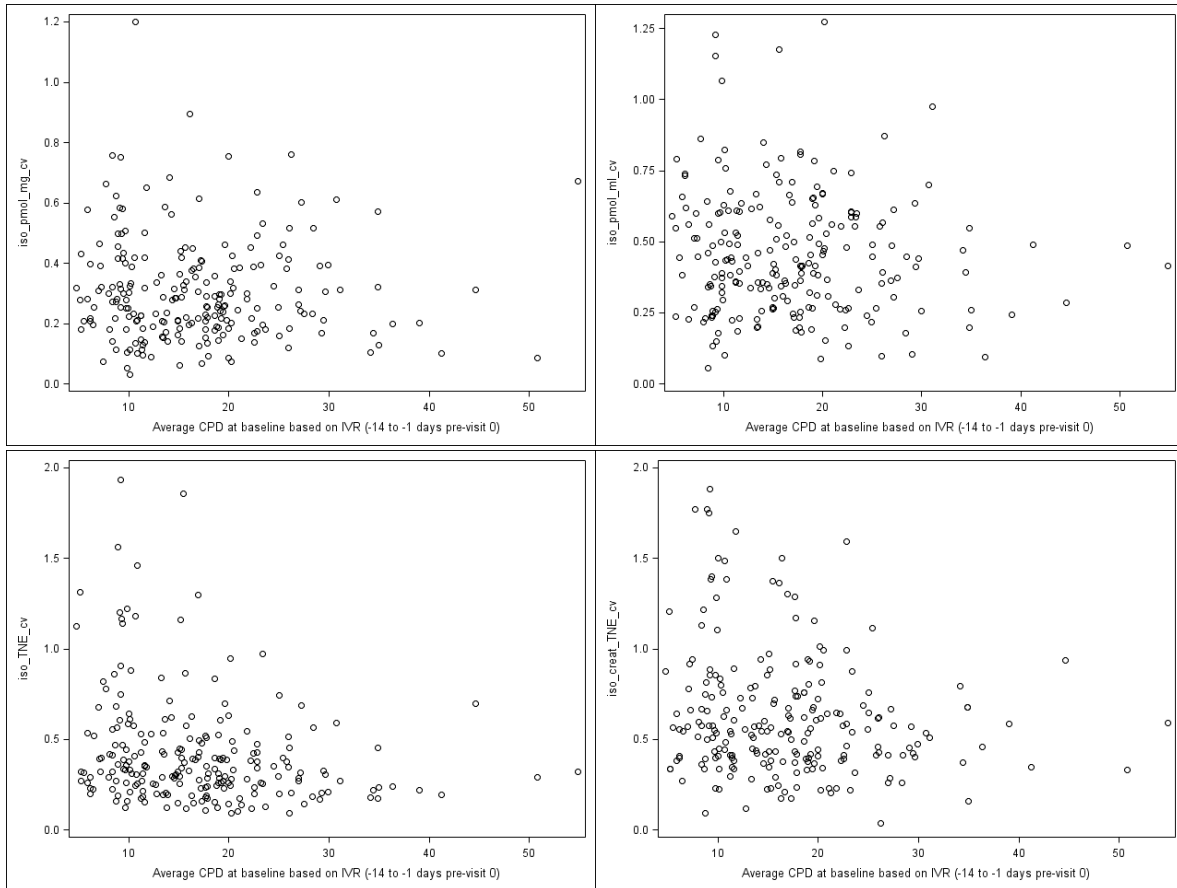

**CV of PGEM/creatinine (pmol/mg), PGEM (pmol/mL), PGEM (TNE corrected,  $\times 10^3$ ), and PGEM (uL/mg, creatinine and TNE corrected) vs. CPD**

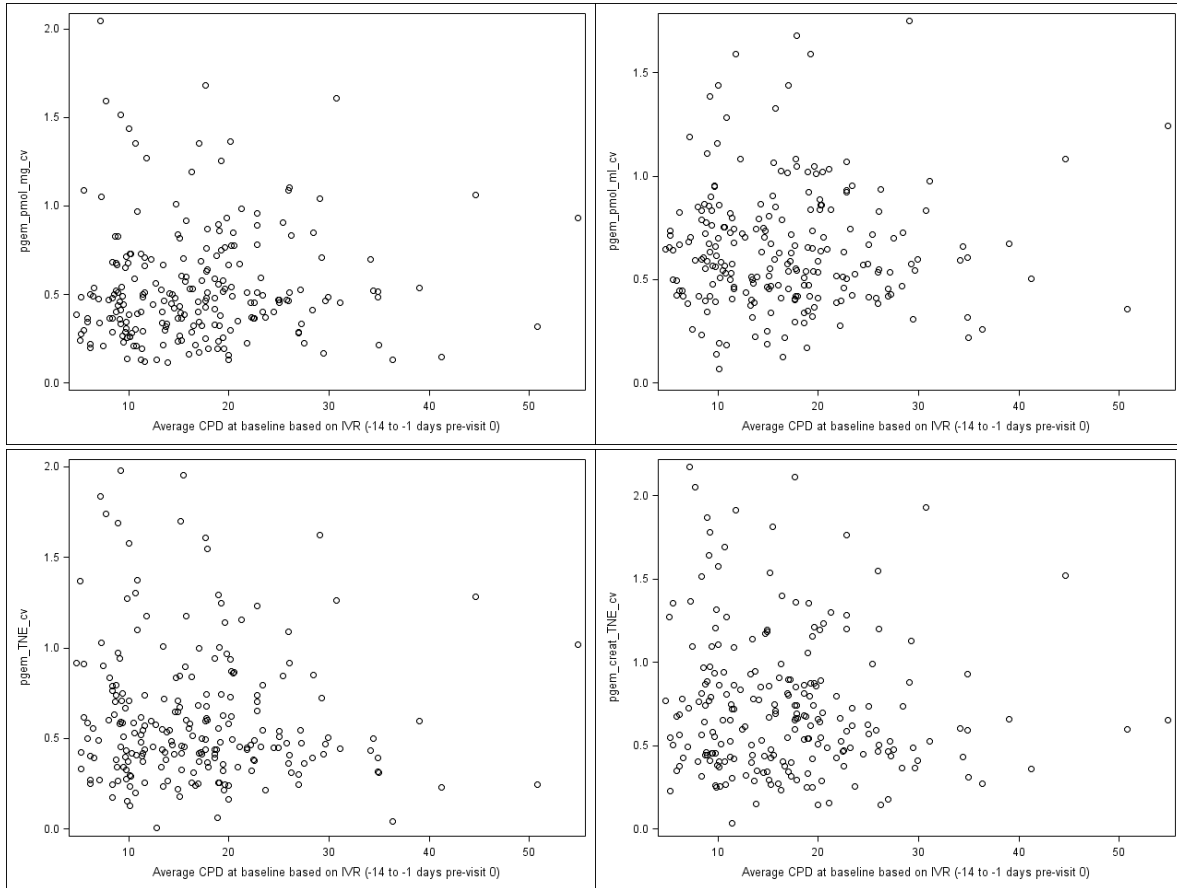

Supplement: pone.0215853.s010.pdf [file pone.0215853.s010.pdf]
