# Supplementary material for: Longitudinal stability in cigarette smokers of urinary eicosanoid biomarkers of oxidative damage and inflammation
Source: PubMed Central journal article supplement (PMC6483352; doi:10.1371/journal.pone.0215853), 2019-04-25
Supplement: pone.0215853.s012.pdf [file pone.0215853.s012.pdf]

## S12 Supporting Information. Related analysis for C-Reactive protein (CRP).

### CRP Analysis (11/22/2018)

**Note:** In the JAMA paper, CRP was analyzed two different ways, using all values and using only values  $\leq 10$  mg/L. In this report, all CRP values were used.

### Summary by week

Analysis Variable : CRP\_LOD\_imputed CRP (mg/L), LOD imputed with 1/2 of LOD ( $0.5 \times 0.15 = 0.075$ )

| visitnum | N Obs | N nonmissing | Mean  | Std Dev | Std Error | Minimum | Maximum | Median | Geometric Mean |
|----------|-------|--------------|-------|---------|-----------|---------|---------|--------|----------------|
| 4        | 249   | 226          | 4.182 | 6.814   | 0.453     | 0.075   | 47.870  | 1.840  | 2.002          |
| 8        | 235   | 207          | 3.612 | 5.350   | 0.372     | 0.260   | 58.040  | 1.980  | 2.077          |
| 12       | 225   | 205          | 4.805 | 9.435   | 0.659     | 0.170   | 76.340  | 2.180  | 2.300          |
| 16       | 218   | 197          | 3.980 | 5.796   | 0.413     | 0.150   | 50.260  | 2.230  | 2.204          |
| 20       | 216   | 199          | 4.148 | 6.006   | 0.426     | 0.210   | 45.990  | 2.290  | 2.217          |

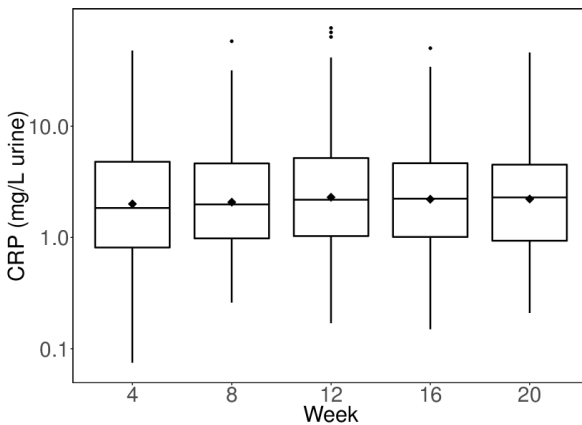

### Repeated measures analysis for each covariate

| Outcome Variable | Covariate                      | Estimated fixed effect (95% CI), p-value |
|------------------|--------------------------------|------------------------------------------|
| Log(CRP)         | Female                         | 0.01 (-0.25, 0.27)<br>p = 0.92           |
|                  | Age ( $\times 10$ years)       | 0.19 (0.10, 0.29)<br>p < 0.0001          |
|                  | BMI ( $\text{kg}/\text{m}^2$ ) | 0.08 (0.06, 0.09)<br>p < 0.0001          |
|                  | CPD ( $\times 10$ )            | 0.01 (0.00, 0.03)<br>p = 0.06            |

**Conclusion:** Older age and larger BMI were significantly associated with higher CRP level.

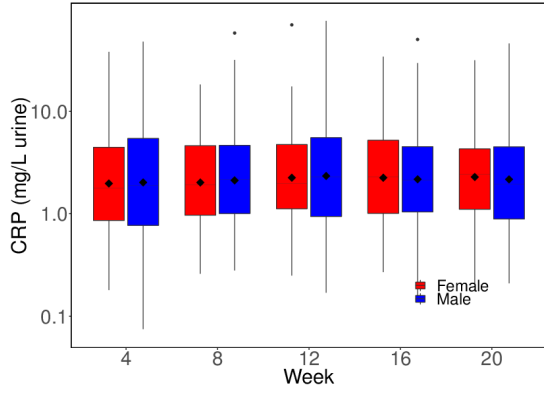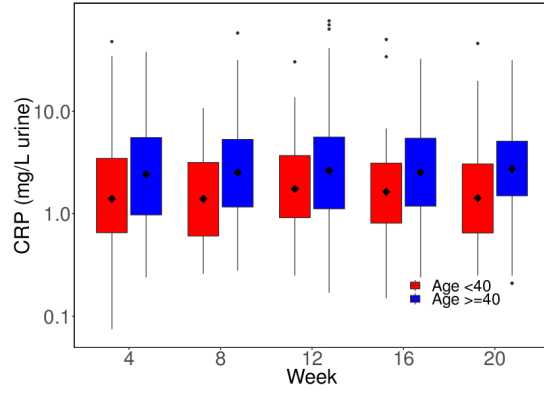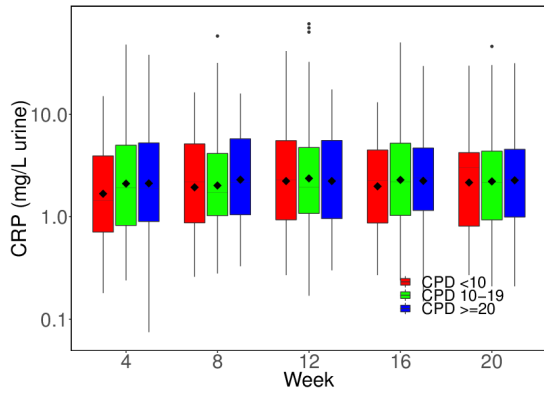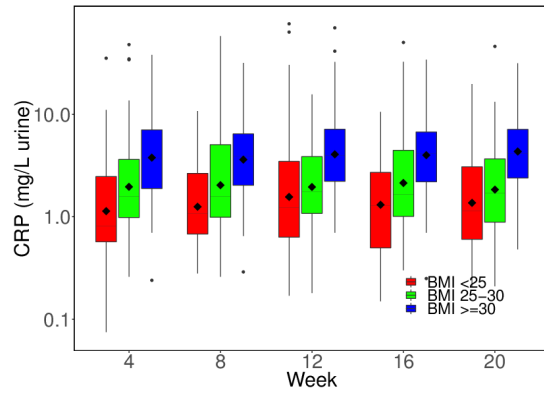

### Coefficient of variation (CV)

| Variable             | CV  |             |        |           |           |         |         |
|----------------------|-----|-------------|--------|-----------|-----------|---------|---------|
|                      | N   | Mean        | Median | 25th Pctl | 75th Pctl | Minimum | Maximum |
| <i>Overall group</i> | 216 | <b>0.50</b> | 0.35   | 0.23      | 0.61      | 0.04    | 2.00    |
| Female               | 94  | <b>0.46</b> | 0.33   | 0.22      | 0.56      | 0.09    | 1.84    |
| Male                 | 122 | <b>0.54</b> | 0.38   | 0.24      | 0.73      | 0.04    | 2.00    |
| Age<40               | 73  | <b>0.60</b> | 0.41   | 0.20      | 0.92      | 0.05    | 2.00    |
| Age>=40              | 143 | <b>0.46</b> | 0.34   | 0.24      | 0.55      | 0.04    | 1.82    |
| BMI<25               | 76  | <b>0.56</b> | 0.37   | 0.24      | 0.77      | 0.05    | 1.84    |
| BMI 25-29            | 70  | <b>0.57</b> | 0.39   | 0.28      | 0.73      | 0.09    | 2.00    |
| BMI>=30              | 70  | <b>0.37</b> | 0.31   | 0.17      | 0.46      | 0.04    | 1.84    |
| CPD<10               | 51  | <b>0.45</b> | 0.35   | 0.26      | 0.60      | 0.09    | 1.35    |
| CPD 10-19            | 106 | <b>0.58</b> | 0.36   | 0.23      | 0.79      | 0.04    | 2.00    |
| CPD>=20              | 59  | <b>0.41</b> | 0.36   | 0.19      | 0.51      | 0.06    | 1.47    |

Bivariate regression p-value for each covariate, the sign in parenthesis by the significant p-value indicates the direction of the correlation

| Covariate | p-value (direction of correlation) |
|-----------|------------------------------------|
| Female    | 0.2033                             |
| Age       | 0.0720                             |
| BMI       | <b>0.0134 (-)</b>                  |
| CPD       | 0.3344                             |

Multivariate regression p-value of each covariate, the sign in parenthesis by the significant p-value indicates the direction of the correlation

| Covariate | p-value (direction of correlation) |
|-----------|------------------------------------|
| Female    | 0.2270                             |
| Age       | 0.1047                             |
| BMI       | <b>0.0251 (-)</b>                  |
| CPD       | 0.5406                             |

**Conclusion:** Higher BMI was significantly associated with lower CV, i.e., better longitudinal stability.

**ICC**

| Variable | Factor  | Level  | N of subjects | ICC (95% CI)      |
|----------|---------|--------|---------------|-------------------|
| Log(CRP) | Overall | -      | 227           | 0.72 (0.67, 0.76) |
|          | Gender  | Female | 99            | 0.75 (0.68, 0.81) |
|          |         | Male   | 128           | 0.70 (0.64, 0.76) |
|          | Age     | <40    | 79            | 0.60 (0.50, 0.70) |
|          |         | ≥40    | 148           | 0.76 (0.70, 0.81) |
|          | BMI     | <25    | 79            | 0.62 (0.52, 0.71) |
|          |         | 25-29  | 74            | 0.63 (0.53, 0.72) |
|          |         | ≥30    | 74            | 0.78 (0.71, 0.84) |
|          | CPD     | <10    | 53            | 0.80 (0.72, 0.87) |
|          |         | 10-19  | 110           | 0.63 (0.55, 0.71) |
|          |         | ≥20    | 64            | 0.81 (0.74, 0.87) |
